# Supplementary material for: Variation in Tree Species Ability to Capture and Retain Airborne Fine Particulate Matter (PM2.5)
Source: PubMed Central journal article supplement (PMC5466687; doi:10.1038/s41598-017-03360-1), 2017-06-09
Supplement: 41598_2017_3360_MOESM1_ESM.pdf [file 41598_2017_3360_MOESM1_ESM.pdf]

# **Variation in Tree Species Ability to Capture and Retain Airborne Fine Particulate Matter (PM<sub>2.5</sub>)**

**Lixin Chen<sup>1,a</sup>, Chenming Liu<sup>2,a</sup>, Lu Zhang<sup>3,a</sup>, Rui Zou<sup>a</sup>, Zhiqiang Zhang<sup>a\*</sup>**

<sup>a</sup> College of Soil & Water Conservation, Beijing Forestry University, Qinghua East Road

35, Haidian District, Beijing 100083, PR China

1,2, and 3 equally contributed to this work;

\*Corresponding author Email address: zhqzhang@bjfu.edu.cn.

## Species PM<sub>2.5</sub> accumulation & S.D. (ug.cm<sup>-2</sup>)

|                                     | Summer-Autumn | Spring | Summer-Autumn S.D | Spring S.D. |
|-------------------------------------|---------------|--------|-------------------|-------------|
| <i>Fraxinus pennsylvanica</i>       | 5.935         | 0.134  | 0.672             | 0.078       |
| <i>Ailanthus altissima</i>          | 4.635         | 1.509  | 0.566             | 0.274       |
| <i>Sophora japonica</i>             | 3.603         | 2.147  | 0.720             | 0.587       |
| <i>Koelreuteria paniculata</i>      | 3.819         | 2.166  | 0.964             | 0.490       |
| <i>Prunus Cerasifera</i>            | 4.144         | 2.278  | 0.724             | 0.463       |
| <i>Syringa reticulata</i>           | 6.539         | 2.320  | 0.717             | 0.579       |
| <i>Catalpa speciosa</i>             | 17.894        | 2.399  | 0.483             | 0.424       |
| <i>Aesculus chinensis</i>           | 6.412         | 2.655  | 0.257             | 0.367       |
| <i>Amygdalus triloba</i>            | 11.424        | 2.783  | 0.363             | 0.660       |
| <i>Metasequoia glyptostroboides</i> | 3.748         | 0.849  | 5.469             | 0.044       |
| <i>Crataegus pinnatifida</i>        | 2.545         | 5.016  | 0.120             | 0.878       |
| <i>Ginkgo biloba</i>                | 5.881         | 5.501  | 0.343             | 1.217       |
| <i>Quercus variabilis</i>           | 9.755         | 7.503  | 0.302             | 1.407       |
| <i>Ulmus pumila</i>                 | 13.553        | 8.947  | 0.596             | 1.451       |
| <i>Broussonetia papyrifera</i>      | 10.893        | 10.938 | 0.273             | 1.667       |
| <i>Pinus armandii</i>               | 4.801         |        | 0.129             |             |
| <i>Platanus occidentalis</i>        | 3.135         |        | 0.053             |             |
| <i>Eucommia ulmoides</i>            | 2.623         |        | 0.151             |             |
| <i>Tilia tuan</i>                   | 2.159         |        | 0.222             |             |
| <i>Armeniaca sibirica</i>           | 2.398         |        | 0.297             |             |
| <i>Parthenocissus thomsoni</i>      | 2.983         |        | 0.324             |             |
| <i>Malus micromalus</i>             | 2.499         |        | 0.299             |             |
| <i>Lonicera maackii</i>             | 3.007         |        | 0.289             |             |
| <i>Euonymus japonicus</i>           | 4.097         |        | 0.140             |             |
| <i>Philadelphus pekinensis</i>      | 5.888         |        | 0.310             |             |
| <i>Magnolia denudata</i>            | 13.191        |        | 1.900             |             |
| <i>Pinus tabuliformis</i>           | 83.385        |        | 3.360             |             |
| <i>Taxus cuspidatavar.nana</i>      | 10.182        |        | 2.800             |             |
| <i>Cedrus deodara</i>               | 29.690        |        | 1.920             |             |
| <i>Platyclusus orientalis</i>       | 30.111        |        | 3.901             |             |
| <i>Pinus armandii</i>               | 29.091        |        | 1.220             |             |

## Weights of PM fractions

| <b>Spring(ug.cm<sup>-2</sup>)</b>   | TSP     | PM>10   | PM <sub>2.5-10</sub> | PM <sub>2.5</sub> |
|-------------------------------------|---------|---------|----------------------|-------------------|
| <i>Fraxinus pennsylvanica</i>       | 30.480  | 30.247  | 0.097                | 0.134             |
| <i>Ailanthus altissima</i>          | 27.915  | 17.628  | 7.890                | 1.509             |
| <i>Sophora japonica</i>             | 15.352  | 6.102   | 7.103                | 2.146             |
| <i>Koelreuteria paniculata</i>      | 54.390  | 51.454  | 0.770                | 2.166             |
| <i>Prunus Cerasifera</i>            | 74.641  | 64.115  | 8.248                | 2.278             |
| <i>Syringa reticulata</i>           | 48.638  | 43.625  | 2.694                | 2.320             |
| <i>Catalpa speciosa</i>             | 30.028  | 43.625  | 5.998                | 2.399             |
| <i>Aesculus chinensis</i>           | 53.114  | 40.577  | 9.883                | 2.655             |
| <i>Amygdalus triloba</i>            | 58.748  | 40.627  | 15.338               | 2.783             |
| <i>Metasequoia glyptostroboides</i> | 53.531  | 49.015  | 0.767                | 0.849             |
| <i>Crataegus pinnatifida</i>        | 74.081  | 47.832  | 21.234               | 5.016             |
| <i>Ginkgo biloba</i>                | 47.419  | 39.402  | 2.515                | 5.501             |
| <i>Quercus variabilis</i>           | 117.336 | 100.582 | 9.251                | 7.503             |
| <i>Ulmus pumila</i>                 | 43.224  | 28.735  | 5.542                | 8.947             |
| <i>Broussonetia papyrifera</i>      | 122.446 | 99.301  | 12.208               | 10.938            |

| <b>Summer-autumn(ug.cm<sup>-2</sup>)</b> | TSP     | PM>10   | PM <sub>2.5-10</sub> | PM <sub>2.5</sub> |
|------------------------------------------|---------|---------|----------------------|-------------------|
| <i>Fraxinus pennsylvanica</i>            | 11.873  | 5.407   | 0.531                | 5.935             |
| <i>Ailanthus altissima</i>               | 21.106  | 16.239  | 0.232                | 4.635             |
| <i>Sophora japonica</i>                  | 9.904   | 6.044   | 0.258                | 3.603             |
| <i>Koelreuteria paniculata</i>           | 10.481  | 6.311   | 0.352                | 3.819             |
| <i>Prunus Cerasifera</i>                 | 9.439   | 5.072   | 0.223                | 4.144             |
| <i>Syringa reticulata</i>                | 12.257  | 5.342   | 0.376                | 6.539             |
| <i>Catalpa speciosa</i>                  | 24.748  | 6.743   | 0.111                | 17.894            |
| <i>Aesculus chinensis</i>                | 14.850  | 8.407   | 0.031                | 6.412             |
| <i>Amygdalus triloba</i>                 | 20.847  | 9.141   | 0.282                | 11.424            |
| <i>Metasequoia glyptostroboides</i>      | 17.990  | 11.698  | 2.543                | 3.748             |
| <i>Crataegus pinnatifida</i>             | 71.570  | 47.812  | 21.214               | 2.545             |
| <i>Ginkgo biloba</i>                     | 10.068  | 3.840   | 0.347                | 5.881             |
| <i>Quercus variabilis</i>                | 23.202  | 13.334  | 0.114                | 9.755             |
| <i>Ulmus pumila</i>                      | 26.533  | 12.659  | 0.322                | 13.553            |
| <i>Broussonetia papyrifera</i>           | 24.310  | 13.164  | 0.253                | 10.893            |
| <i>Pinus armandii</i>                    | 36.497  | 5.847   | 25.848               | 4.801             |
| <i>Platanus occidentalis</i>             | 14.017  | 10.263  | 0.619                | 3.135             |
| <i>Eucommia ulmoides</i>                 | 32.504  | 21.191  | 8.690                | 2.623             |
| <i>Tilia tuan</i>                        | 12.767  | 8.528   | 2.081                | 2.159             |
| <i>Armeniaca sibirica</i>                | 6.814   | 4.065   | 0.352                | 2.398             |
| <i>Parthenocissus thomsoni</i>           | 67.843  | 59.973  | 4.887                | 2.983             |
| <i>Malus micromalus</i>                  | 7.161   | 4.382   | 0.280                | 2.499             |
| <i>Lonicera maackii</i>                  | 12.787  | 9.234   | 0.546                | 3.007             |
| <i>Euonymus japonicus</i>                | 26.158  | 18.555  | 3.506                | 4.097             |
| <i>Philadelphus pekinensis</i>           | 17.754  | 11.416  | 0.450                | 5.888             |
| <i>Magnolia denudata</i>                 | 29.014  | 14.091  | 1.733                | 13.191            |
| <i>Pinus tabuliformis</i>                | 130.276 | 103.373 | 3.518                | 23.385            |
| <i>Taxus cuspidatavar.nana</i>           | 18.491  | 7.796   | 0.513                | 10.182            |
| <i>Cedrus deodara</i>                    | 57.465  | 18.555  | 9.221                | 29.690            |

|                               |        |        |       |        |
|-------------------------------|--------|--------|-------|--------|
| <i>Platycladus orientalis</i> | 55.727 | 21.631 | 3.985 | 30.111 |
| <i>Pinus armandii</i>         | 57.776 | 23.459 | 5.226 | 29.091 |
